# Supplementary material
Source: PubMed Central journal article supplement (PMC4622733)

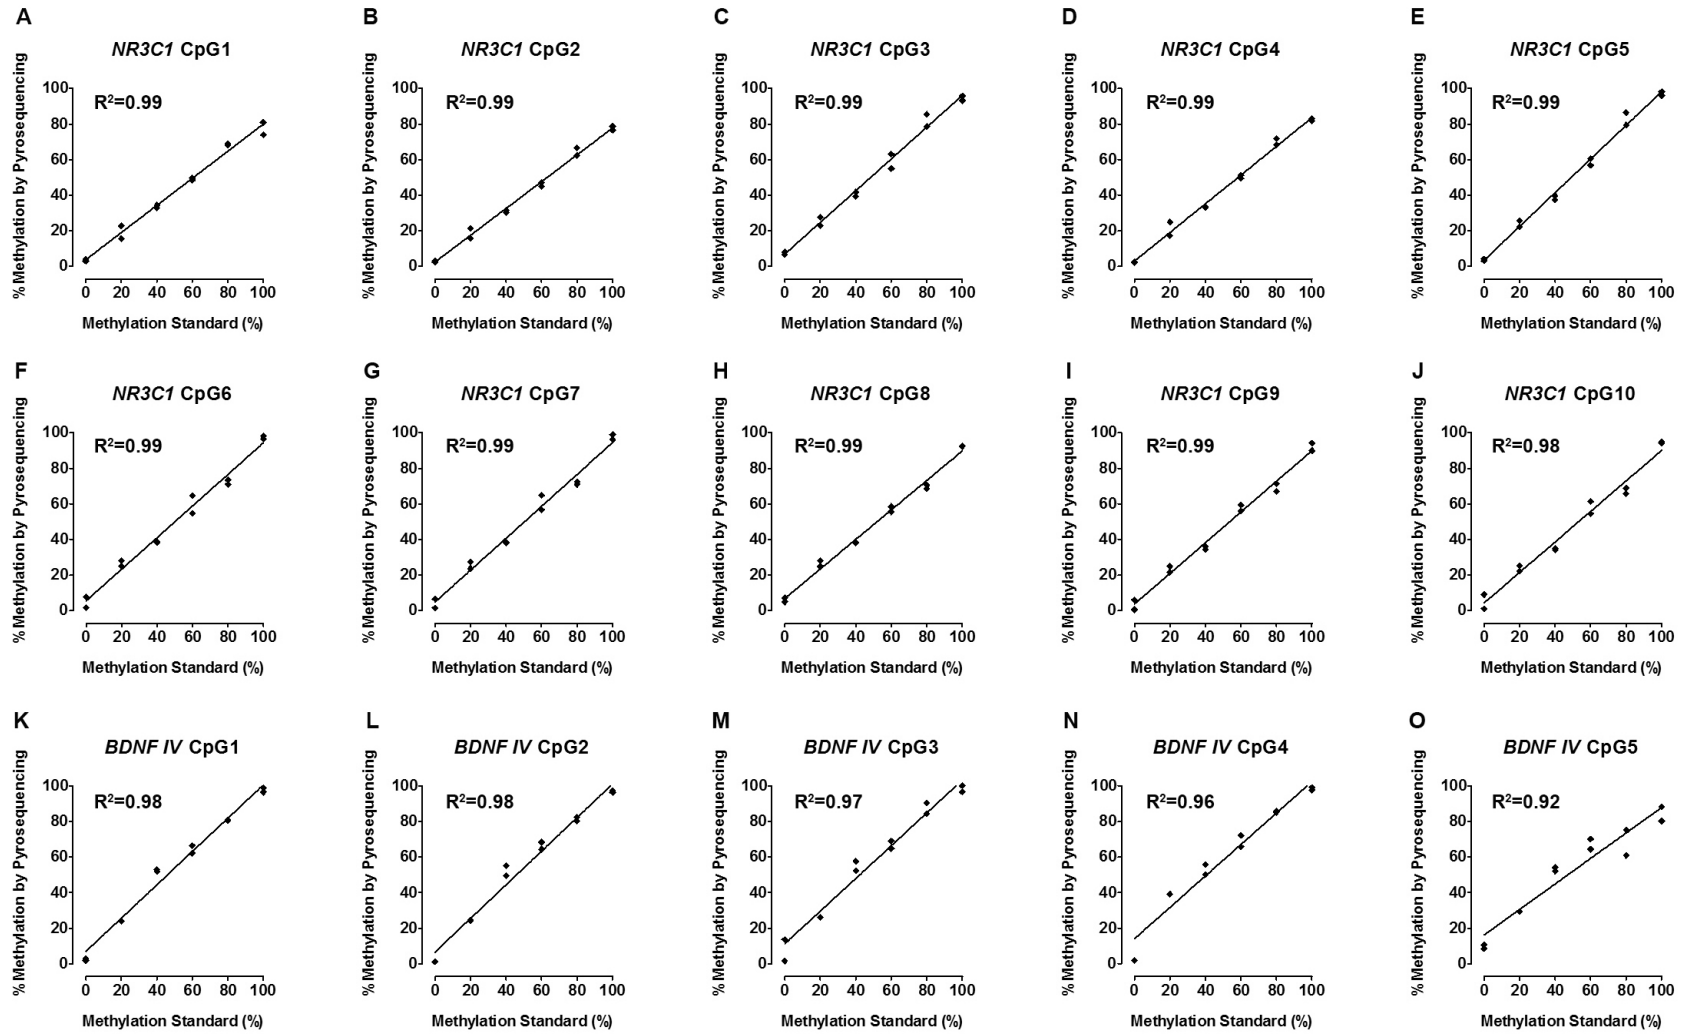

**Supplementary Figure 1:** Standard curves for the *NR3C1* (A-J) and *BDNF IV* (K-O) pyrosequencing assays.

Supplement: kepi-10-05-1039221-s001.pdf [file kepi-10-05-1039221-s001.pdf]
